# Supplementary material
Source: Research Square preprint supplement (doi:10.21203/rs.3.rs-9091203/v1)
Supplement: Supplementary file 1 [file 04d965b8d640a47f7739ed91.docx]

**Supplementary Appendix for:**

**Gaussian Process and PCA-Based Methods for GNSS Data Gap Filling**

**Supplementary Appendix A: GNSS Observation Data**

**Table A1:** Locations of 70 GNSS stations in the study area and field amplitude of white and flicker noise.Key: Lon = Longitude; Lat = Latitude; WE, WN, WU = amplitude of white noise in the east, north, and up direction (units: mm); FE, FN, FU = amplitude of flicker noise in the east, north, and up direction (units: mm).

| **Index** | **Site** | **Lon (°)** | **Lat (°)** | **WE** | **WN** | **WU** | **FE** | **FN** | **FU** |
| --- | --- | --- | --- | --- | --- | --- | --- | --- | --- |
| 1 | AGOB | 12.471 | 44.5541 | 0.576 | 0.4142 | 1.9619 | 0.6297 | 0.7557 | 2.0832 |
| 2 | AMEB | 12.6624 | 44.4071 | 0.6134 | 0.3064 | 2.149 | 0.7233 | 1.1296 | 2.6402 |
| 3 | ANBL | 13.0788 | 44.2285 | 0.7059 | 0.6493 | 2.4947 | 0.4053 | 0.5825 | 2.2618 |
| 4 | ANEB | 12.7047 | 44.2292 | 0.5353 | 0.4489 | 2.2917 | 0.7422 | 0.8316 | 2.3358 |
| 5 | ANGA | 12.3436 | 44.391 | 0.4762 | 0.5472 | 2.1276 | 0.9964 | 1.0141 | 2.2862 |
| 6 | ANTA | 12.4536 | 44.3897 | 0.6042 | 0.0 | 1.9966 | 0.7278 | 1.0063 | 2.1208 |
| 7 | ANTO | 12.7771 | 44.2141 | 0.563 | 0.362 | 2.2229 | 0.8564 | 0.8622 | 2.2801 |
| 8 | ARIA | 12.6283 | 44.306 | 0.6267 | 0.4699 | 1.9535 | 0.6894 | 0.7607 | 2.0624 |
| 9 | ARM1 | 12.4533 | 44.48 | 0.5792 | 0.0 | 2.0848 | 0.8267 | 1.0763 | 2.2614 |
| 10 | AULL | 9.9729 | 44.2089 | 1.0349 | 0.8829 | 3.1588 | 0.642 | 0.7693 | 2.1586 |
| 11 | AZAB | 12.7205 | 44.1667 | 0.6887 | 0.4543 | 1.9193 | 0.4219 | 0.7307 | 2.1307 |
| 12 | BEVE | 9.7692 | 44.1941 | 0.9144 | 0.8138 | 3.3241 | 0.4186 | 0.7716 | 2.0318 |
| 13 | BLGN | 11.3506 | 44.511 | 0.6727 | 0.6461 | 2.0974 | 0.667 | 0.7145 | 3.5735 |
| 14 | BOLG | 11.3568 | 44.5002 | 0.6946 | 0.6656 | 1.7395 | 0.778 | 0.7051 | 4.1802 |
| 15 | BOLO | 11.3288 | 44.4876 | 0.7635 | 0.6315 | 2.3041 | 0.5035 | 0.7827 | 2.9542 |
| 16 | BOR_ | 10.696 | 44.3062 | 1.0973 | 0.9204 | 3.2785 | 0.5163 | 0.9298 | 1.9028 |
| 17 | BRAS | 11.1131 | 44.1222 | 0.9934 | 1.1538 | 3.3221 | 0.5444 | 1.0552 | 2.0077 |
| 18 | BRIS | 11.766 | 44.2248 | 0.685 | 0.7302 | 2.4006 | 0.4759 | 0.5691 | 2.6448 |
| 19 | BRU1 | 9.7249 | 44.2364 | 0.9647 | 0.8713 | 3.1976 | 0.4105 | 0.6967 | 2.5429 |
| 20 | CAR_ | 10.0809 | 44.069 | 0.8954 | 0.7104 | 3.7006 | 0.629 | 1.1509 | 3.3476 |
| 21 | CAST | 10.4053 | 44.4316 | 0.8117 | 0.7499 | 2.8458 | 0.4527 | 0.7756 | 2.6323 |
| 22 | CER1 | 12.6392 | 44.2943 | 0.5762 | 0.2582 | 2.1185 | 0.62 | 0.9162 | 2.0643 |
| 23 | CODI | 12.112 | 44.8367 | 0.5661 | 0.5246 | 2.1548 | 0.4351 | 0.4603 | 2.17 |
| 24 | COLL | 10.216 | 44.7528 | 0.6475 | 0.5324 | 2.2557 | 0.5979 | 0.782 | 2.4417 |
| 25 | CONC | 11.0091 | 44.9217 | 0.5946 | 0.5484 | 1.9099 | 0.4235 | 0.5691 | 2.475 |
| 26 | CREM | 10.002 | 45.1466 | 0.5932 | 0.587 | 2.1697 | 0.3448 | 0.4734 | 1.8397 |
| 27 | FAEZ | 11.8613 | 44.3028 | 0.5824 | 0.6357 | 1.9424 | 0.5995 | 0.6195 | 2.6696 |
| 28 | FERA | 11.627 | 44.813 | 0.588 | 0.5377 | 1.8568 | 0.4127 | 0.5201 | 2.3982 |
| 29 | FERR | 11.6013 | 44.8279 | 0.6249 | 0.5269 | 1.8206 | 0.3931 | 0.5088 | 2.2575 |
| 30 | FIRE | 11.378 | 44.1183 | 1.113 | 1.4307 | 4.1405 | 0.8482 | 1.0606 | 2.0738 |
| 31 | FIUN | 12.3159 | 44.3973 | 0.5071 | 0.5315 | 1.9673 | 0.5745 | 0.4721 | 2.1157 |
| 32 | GARB | 12.5316 | 44.4867 | 0.4952 | 0.3914 | 1.8812 | 0.6467 | 0.7343 | 2.0672 |
| 33 | GARC | 12.5153 | 44.5313 | 0.604 | 0.2713 | 2.1581 | 0.6284 | 0.8939 | 2.0645 |
| 34 | GARI | 12.2494 | 44.6769 | 0.6311 | 0.6567 | 2.3288 | 0.4202 | 0.5219 | 2.7247 |
| 35 | GRZM | 11.1481 | 44.2648 | 0.7089 | 0.7046 | 2.3742 | 0.8634 | 0.7814 | 3.0743 |
| 36 | GUAS | 10.6623 | 44.9178 | 0.5991 | 0.607 | 2.2908 | 0.447 | 0.4786 | 1.9046 |
| 37 | ITIM | 11.7179 | 44.3475 | 0.6999 | 0.69 | 2.0243 | 0.5454 | 0.5925 | 2.4703 |
| 38 | ITRN | 12.5821 | 44.0483 | 0.3681 | 0.6218 | 2.0874 | 0.8607 | 0.4549 | 2.6958 |
| 39 | LASP | 9.8397 | 44.0733 | 0.9347 | 0.7946 | 2.9352 | 0.4377 | 0.4988 | 2.0805 |
| 40 | MAN3 | 12.2251 | 44.7501 | 0.5397 | 0.5023 | 2.2776 | 0.4624 | 0.5037 | 2.2779 |
| 41 | MANT | 10.7894 | 45.1601 | 0.6308 | 0.6777 | 2.0839 | 0.3925 | 0.5139 | 2.0738 |
| 42 | MEDI | 11.6468 | 44.52 | 0.7981 | 0.7227 | 2.5744 | 0.9679 | 0.8798 | 2.0278 |
| 43 | MINE | 11.5014 | 44.6074 | 0.5348 | 0.3639 | 1.6872 | 0.4963 | 0.6902 | 2.3632 |
| 44 | MODE | 10.9487 | 44.629 | 0.5858 | 0.5189 | 2.0042 | 0.4372 | 0.5818 | 2.1945 |
| 45 | MOPS | 10.9492 | 44.6294 | 0.5889 | 0.5104 | 1.8488 | 0.3935 | 0.5168 | 2.3508 |
| 46 | MTRZ | 11.425 | 44.3128 | 0.7388 | 0.5124 | 2.3759 | 0.6552 | 0.9022 | 2.6924 |
| 47 | NAID | 12.7454 | 44.3432 | 1.0655 | 1.0189 | 2.2237 | 0.76 | 0.7421 | 2.0295 |
| 48 | NAPA | 12.8475 | 44.6891 | 0.6768 | 0.5916 | 2.2767 | 0.5909 | 0.6552 | 2.1883 |
| 49 | PAMX | 10.361 | 44.7999 | 0.7609 | 0.7268 | 2.0188 | 0.5523 | 0.6119 | 3.2391 |
| 50 | PARM | 10.3122 | 44.7646 | 0.6319 | 0.5626 | 2.1793 | 0.4675 | 0.5465 | 2.2344 |
| 51 | PCCP | 12.5606 | 44.3911 | 0.4838 | 0.3279 | 1.9644 | 0.846 | 0.8547 | 2.0931 |
| 52 | PCTA | 12.267 | 44.4948 | 0.5328 | 0.5715 | 1.6736 | 0.4821 | 0.4192 | 2.7074 |
| 53 | PCWC | 12.3733 | 44.5092 | 0.504 | 0.5642 | 2.2849 | 0.9226 | 0.8803 | 2.5879 |
| 54 | PERS | 11.1898 | 44.6453 | 0.4904 | 0.5488 | 1.8315 | 0.5652 | 0.4634 | 2.19 |
| 55 | PIAC | 9.6898 | 45.0432 | 0.6364 | 0.6866 | 2.2372 | 0.512 | 0.7071 | 2.8938 |
| 56 | PTO1 | 12.3341 | 44.9515 | 0.6716 | 0.6717 | 2.2787 | 0.4822 | 0.63 | 2.4846 |
| 57 | RAMS | 10.2782 | 44.4114 | 1.0799 | 1.1687 | 3.7112 | 0.4997 | 0.8729 | 1.9553 |
| 58 | RAVE | 12.1919 | 44.4053 | 0.5095 | 0.5055 | 1.7502 | 0.6118 | 0.5718 | 2.4696 |
| 59 | REGG | 10.6369 | 44.7064 | 0.6427 | 0.5982 | 2.0309 | 0.4732 | 0.4854 | 2.1796 |
| 60 | ROV9 | 11.7925 | 45.067 | 0.6097 | 0.5355 | 2.2104 | 0.4606 | 0.6146 | 2.124 |
| 61 | ROVI | 11.7828 | 45.0866 | 0.5859 | 0.5357 | 1.9859 | 0.4434 | 0.5084 | 2.2654 |
| 62 | RUBI | 12.4091 | 44.1501 | 0.5605 | 0.5215 | 2.1947 | 0.5995 | 0.7189 | 3.1198 |
| 63 | SBPO | 10.9198 | 45.051 | 0.5626 | 0.474 | 2.0471 | 0.3963 | 0.5454 | 1.9462 |
| 64 | SERM | 11.2995 | 45.0074 | 0.5769 | 0.4956 | 1.7864 | 0.5354 | 0.6392 | 2.3711 |
| 65 | SGIP | 11.1827 | 44.6355 | 0.0 | 0.0 | 2.0562 | 0.9927 | 0.9951 | 2.6163 |
| 66 | SMAR | 12.2471 | 44.5944 | 0.6312 | 0.5657 | 2.7024 | 0.4957 | 0.547 | 2.3713 |
| 67 | TARO | 9.7657 | 44.4879 | 1.0922 | 0.9706 | 3.2856 | 0.4527 | 0.5711 | 3.1972 |
| 68 | TEAL | 13.0187 | 44.5015 | 0.61 | 0.5635 | 2.3859 | 0.5713 | 0.6681 | 2.2759 |
| 69 | TGPO | 12.2283 | 45.0031 | 0.5471 | 0.536 | 2.2265 | 0.5622 | 0.6389 | 2.2979 |
| 70 | VERG | 11.1105 | 44.2874 | 0.8107 | 0.7306 | 2.67 | 0.5545 | 0.7725 | 2.6479 |

**Supplementary Appendix B: Modelled Volume Changes**

Realistic time series of volume change (∆V) were generated using operational data from actual storage and production sites. For gas storage sites (e.g., Sabbioncello), we used monthly volume data exhibiting seasonal injection-extraction cycles to create synthetic daily series (Fig. B1a,c). This was done by downscaling the monthly values to a daily resolution through the addition of Gaussian-distributed high-frequency variability. Volumes recorded in standard cubic metres (Sm3) were converted to actual cubic metres (m3) using a site-specific conversion factor (see standard cubic foot for methodology*) and subsequently to mm3 for consistency with the units of anthropogenic ground displacement. For hydrocarbon production sites (e.g., Antares), real monthly production data showing long-term depletion trends were used (Fig. B1b, d). Segments of these data were randomly selected and concatenated to form a continuous monthly series, which was then downscaled to daily resolution using the same method.

* <https://en.wikipedia.org/wiki/Standardcubicfoot>


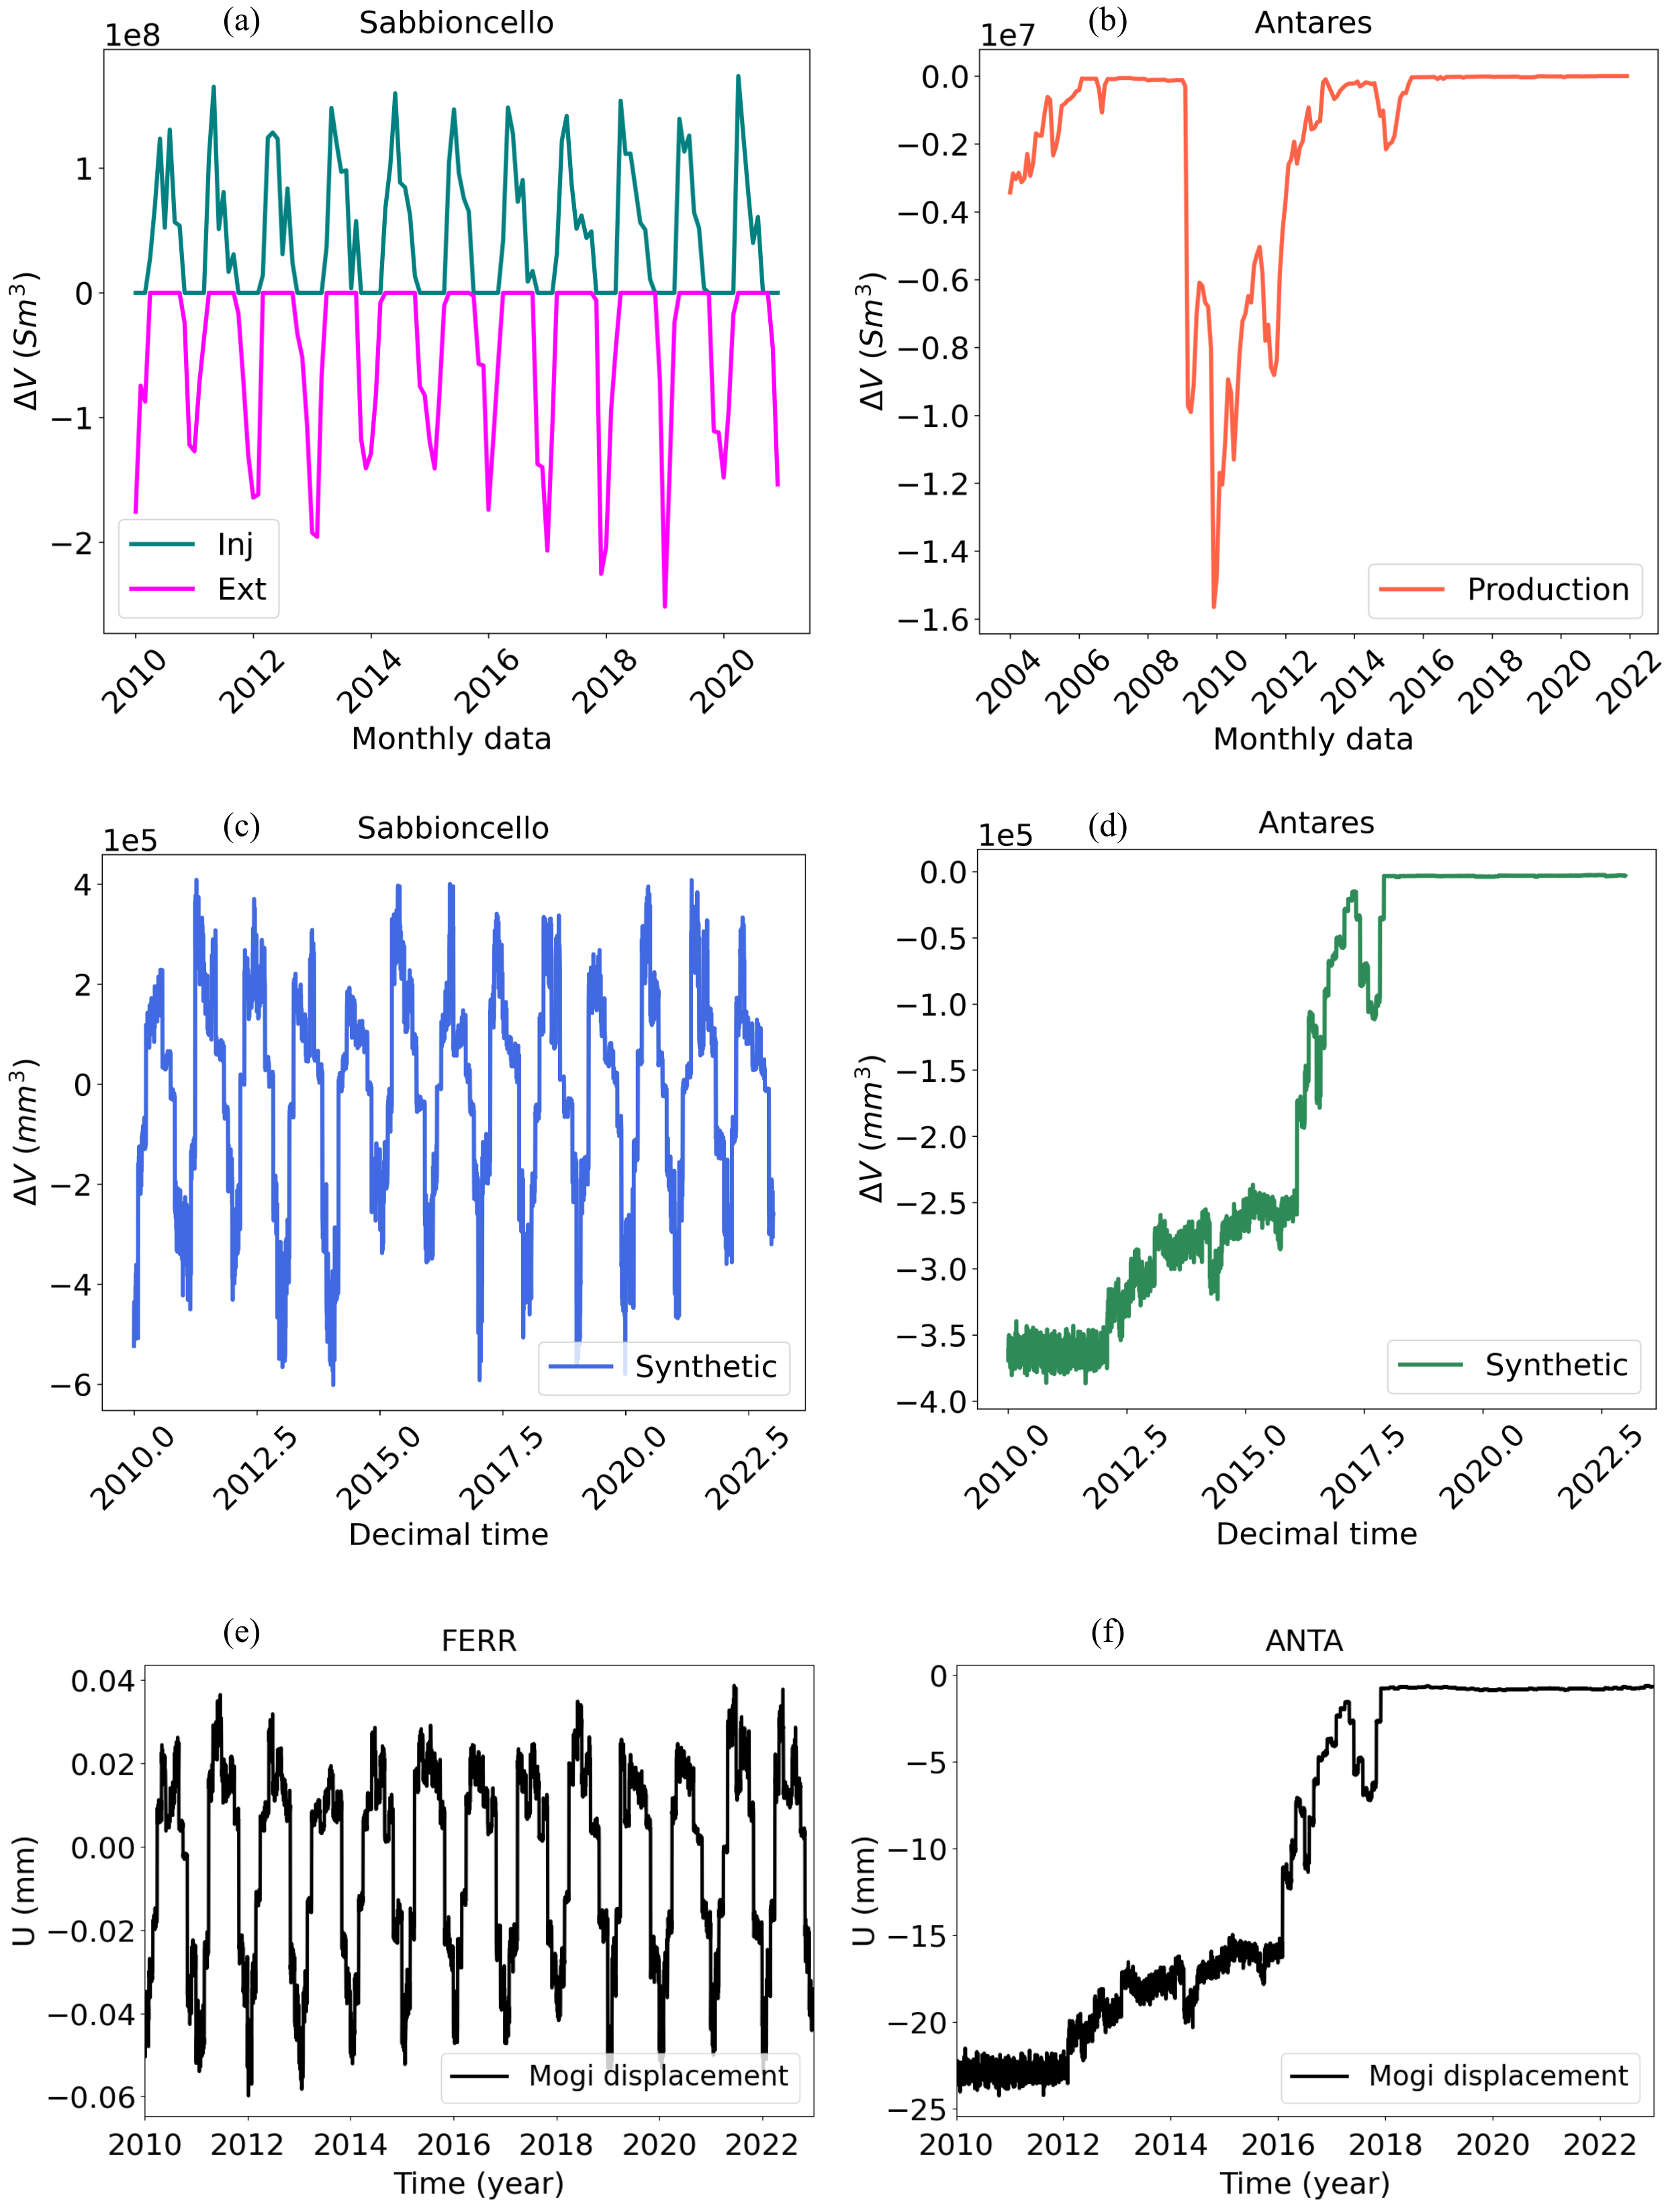


**Fig. B1:** (a) Volume time series for the Sabbioncello gas storage site, showing injection (Inj) and extraction (Ext) cycles. (b) Volume time series for the Antares hydrocarbon production site. (c, d) Synthetically generated daily volume changes for the Sabbioncello and Antares sites, respectively. (e, f) Synthetic Mogi-model surface displacement related to the gas storage and hydrocarbon production volumes at the FERR station (near Sabbioncello) and the ANTA station (at the Antares site).

**Supplementary Appendix C: Cumulative Variance Analysis**

The cumulative variance function was used to determine the number of principal components (PCs) to retain for both the WPCA and EMPCA methods (in Fig. C1). The results, associated with Fig. 9 in the manuscript, are shown below.


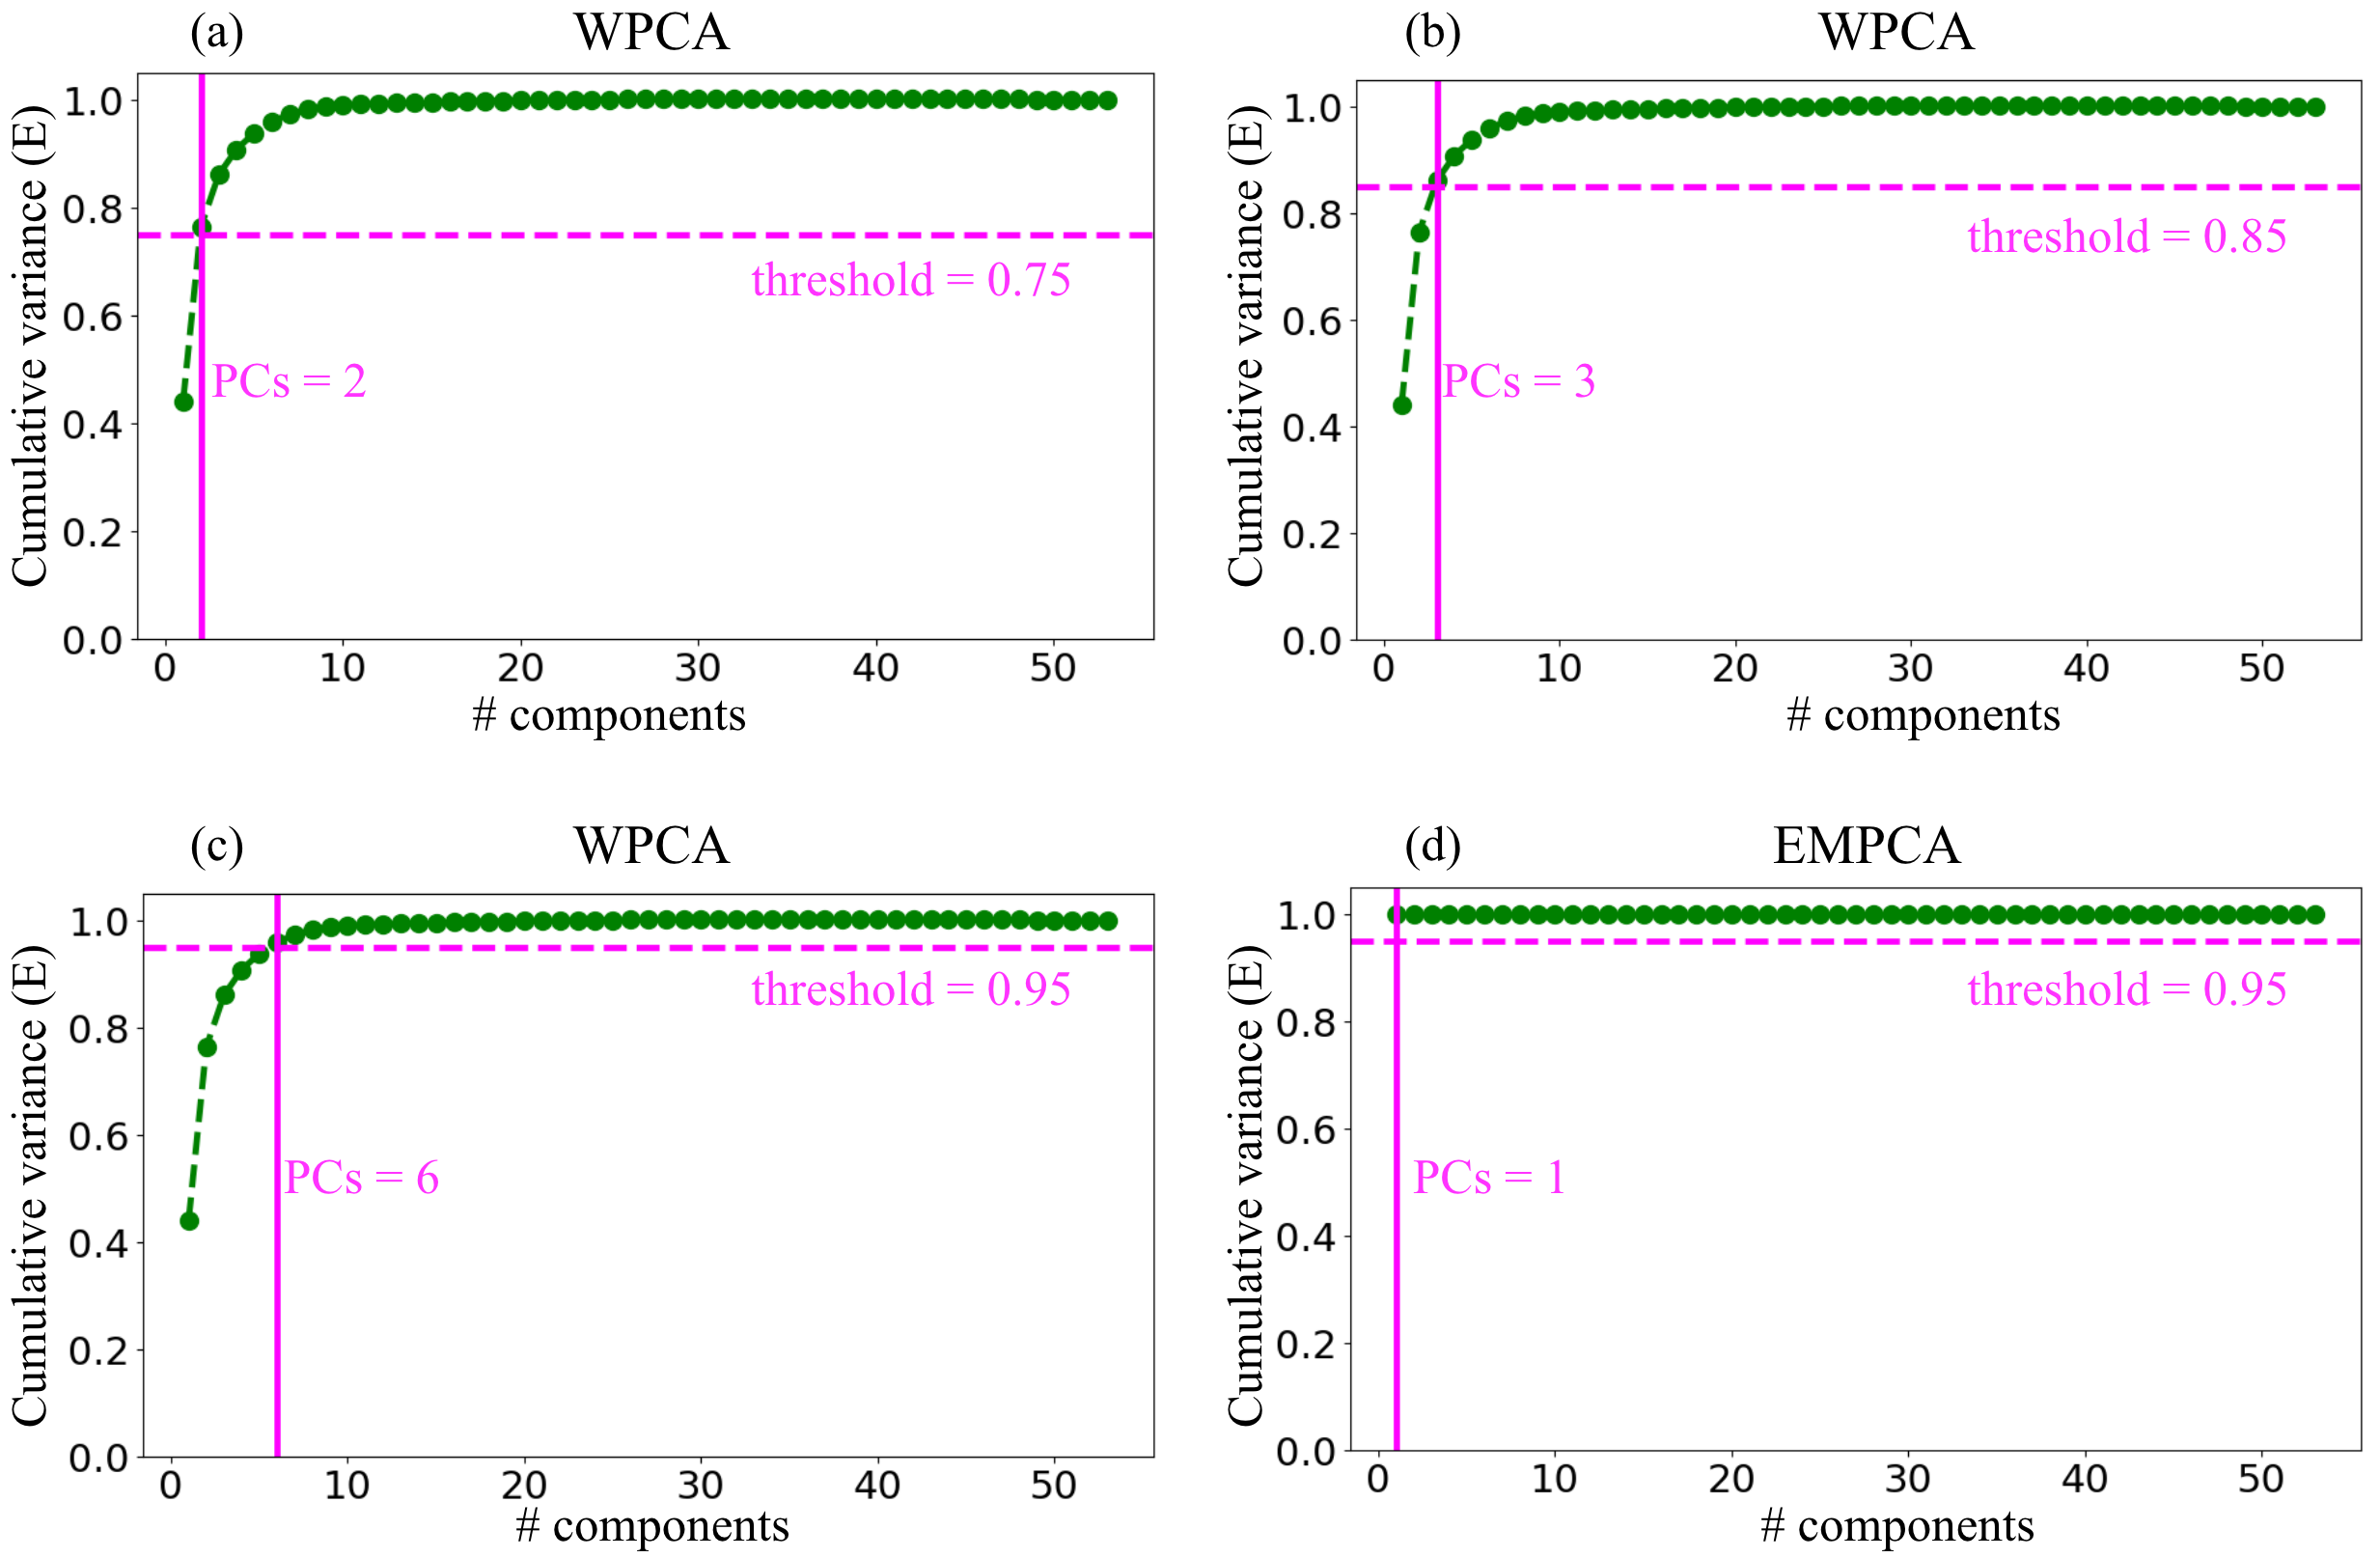
**Fig. C1:** Principal components (PCs) identified at different cumulative variance thresholds: (a) WPCA (threshold = 0.75, PCs = 2); (b) WPCA (threshold = 0.85, PCs = 3); (c) WPCA (threshold = 0.95, PCs = 6); (d) EMPCA (threshold = 0.95, PCs = 1).

**Supplementary Appendix D: Residual Analysis**

Fig. D1 presents the residuals between the ground-truth synthetic data and the GNSS time series reconstructed by a GP. It illustrates the effects of varying individual kernel hyperparameters on the GP reconstruction for the east component at station SBPO.


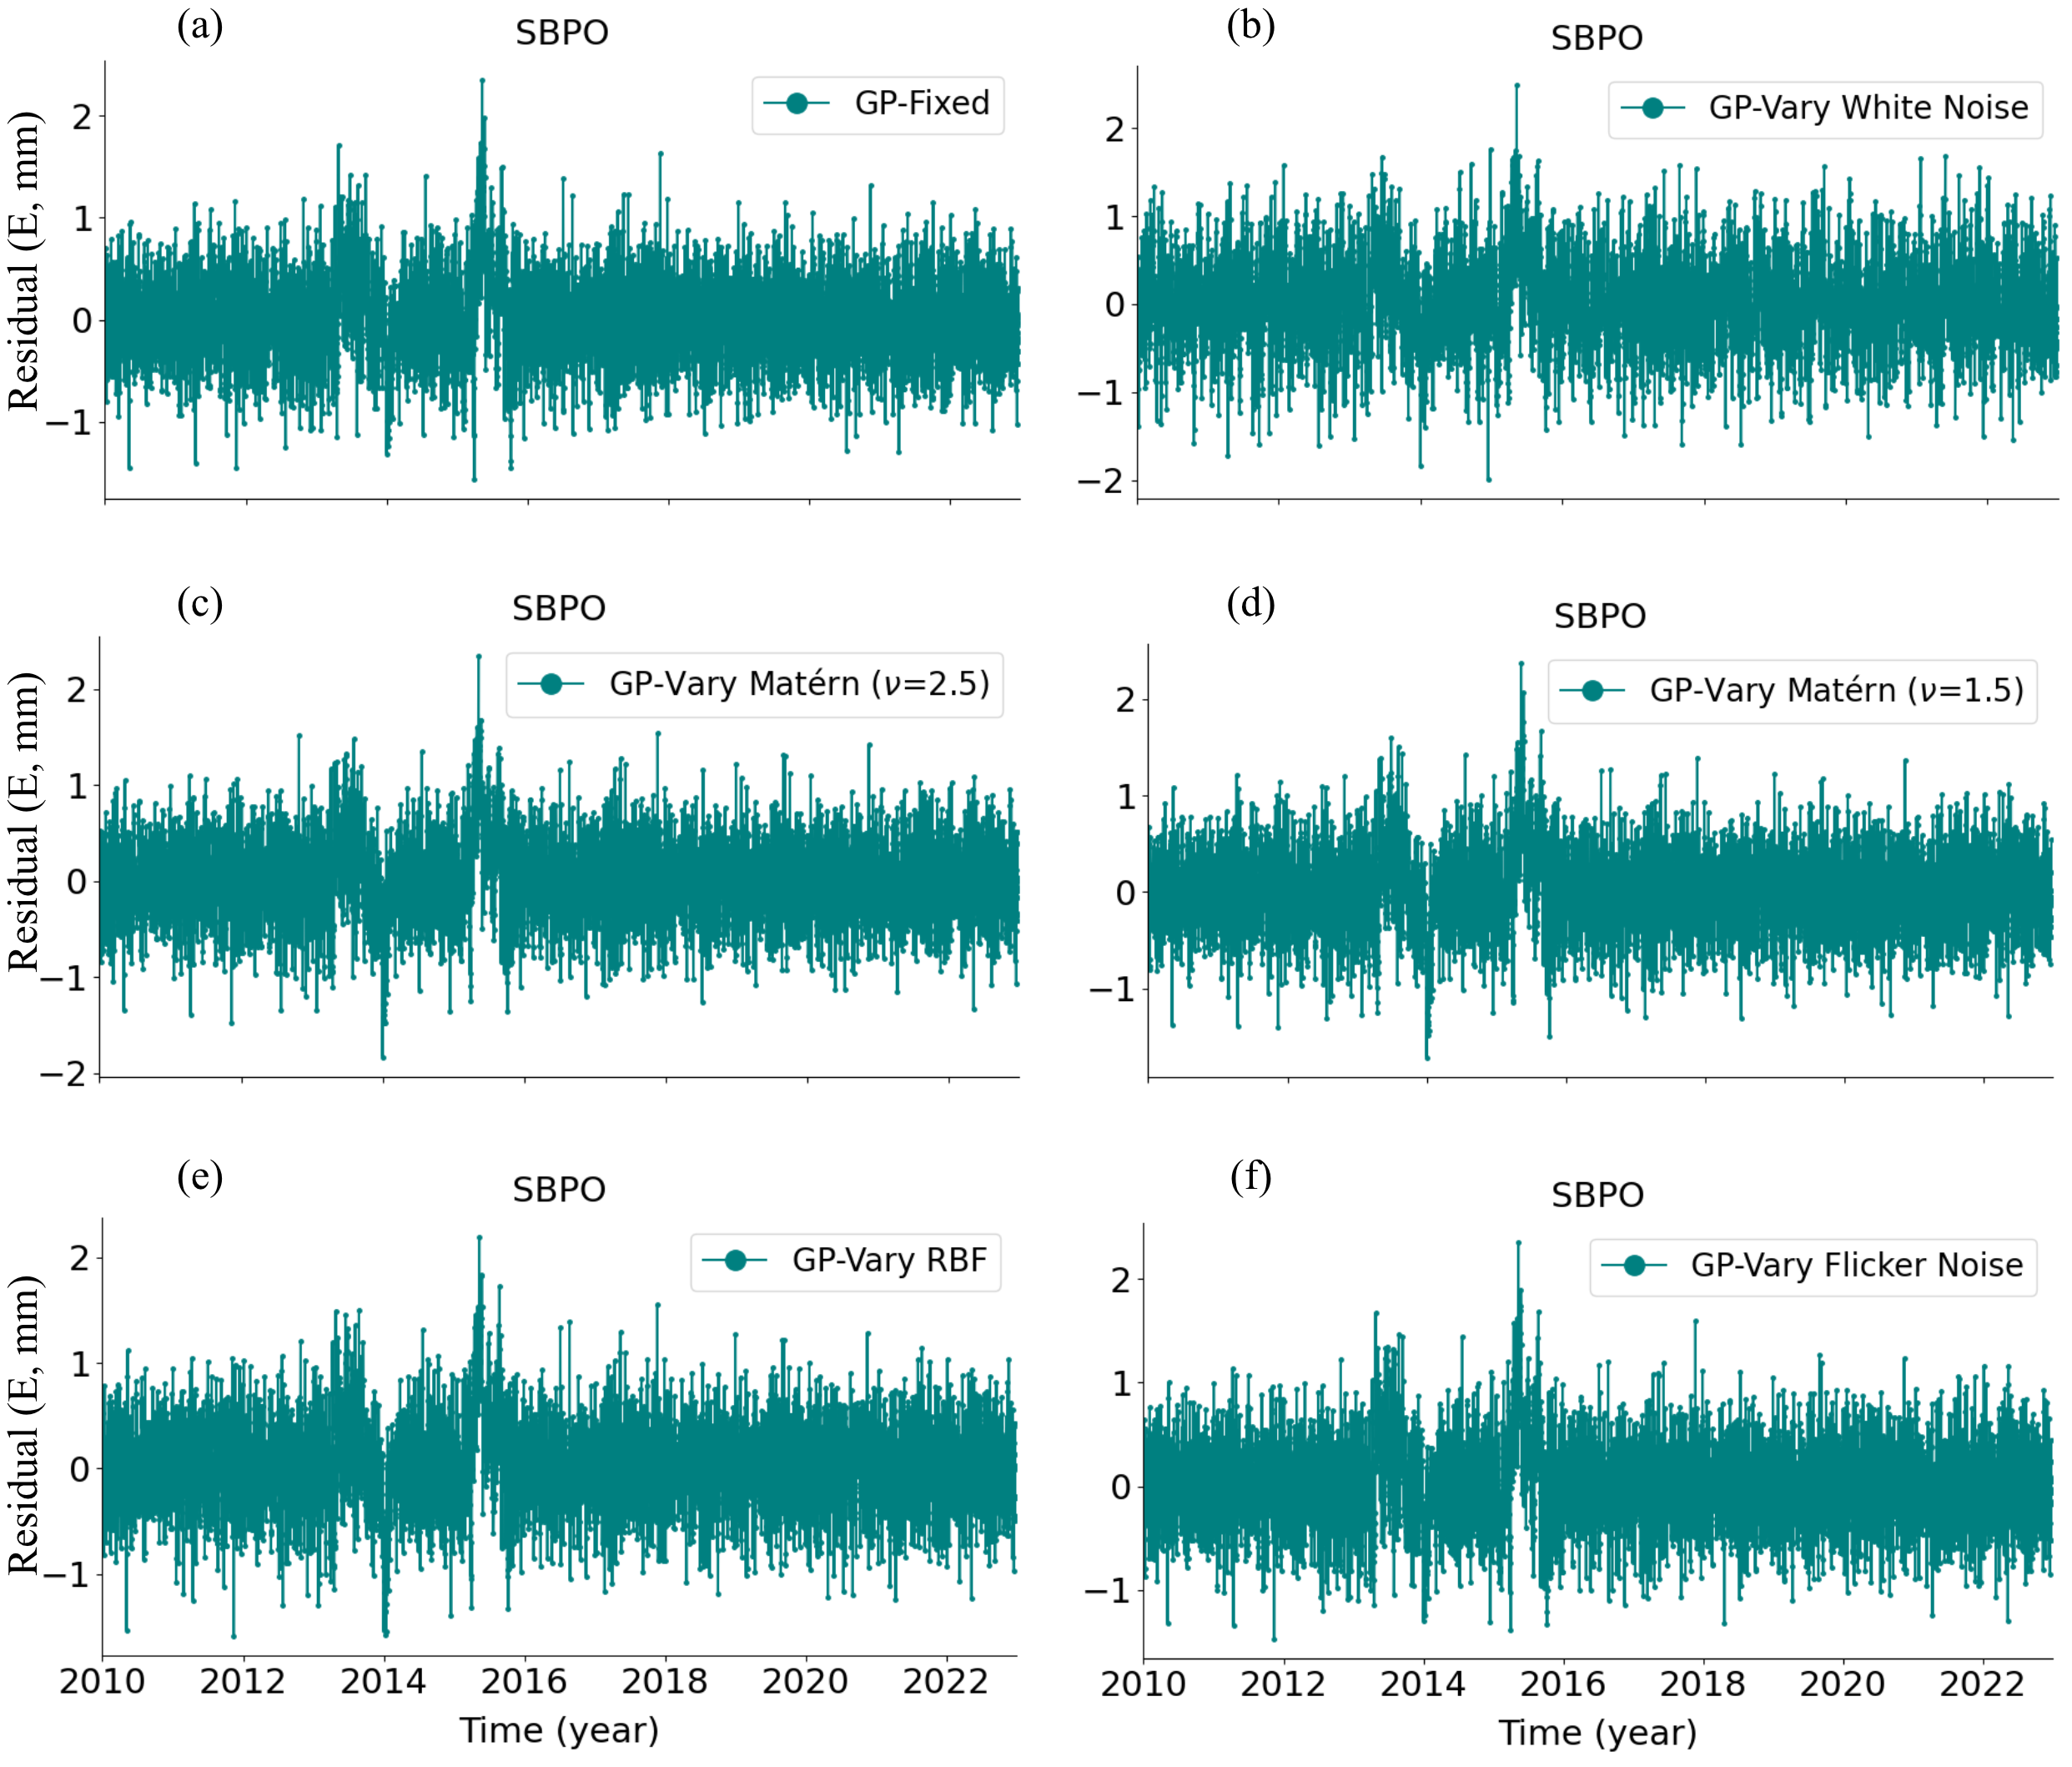
**Fig. D1.** Residual plots for the GP reconstruction tests: (a) Baseline model (GP‑Fixed) with an optimised composite kernel; (b) Modified white noise bounds; (c, d) Adjusted Matérn smoothness parameter (η); (e) Altered radial basis function (RBF) length scale; (f) Modified flicker noise parameters.

**Supplementary Appendix E: Result of Real GNSS Data at ANTA Station**

Fig. E1 compares GP, WPCA and EMPCA for filling gaps in the vertical component (U) at station ANTA. GP produces a smooth, physically plausible reconstruction of trend and seasonality but has higher RMSE/MAE (in panel b). WPCA and EMPCA achieve better statistical fit (lower RMSE, higher R2) by replicating the observed data more closely, though this introduces noise into the gap fills, suggesting possible overfitting (at panel d and f). Overall, GP is better for extracting the underlying signal, while PCA-based methods better reproduce the full data variability.


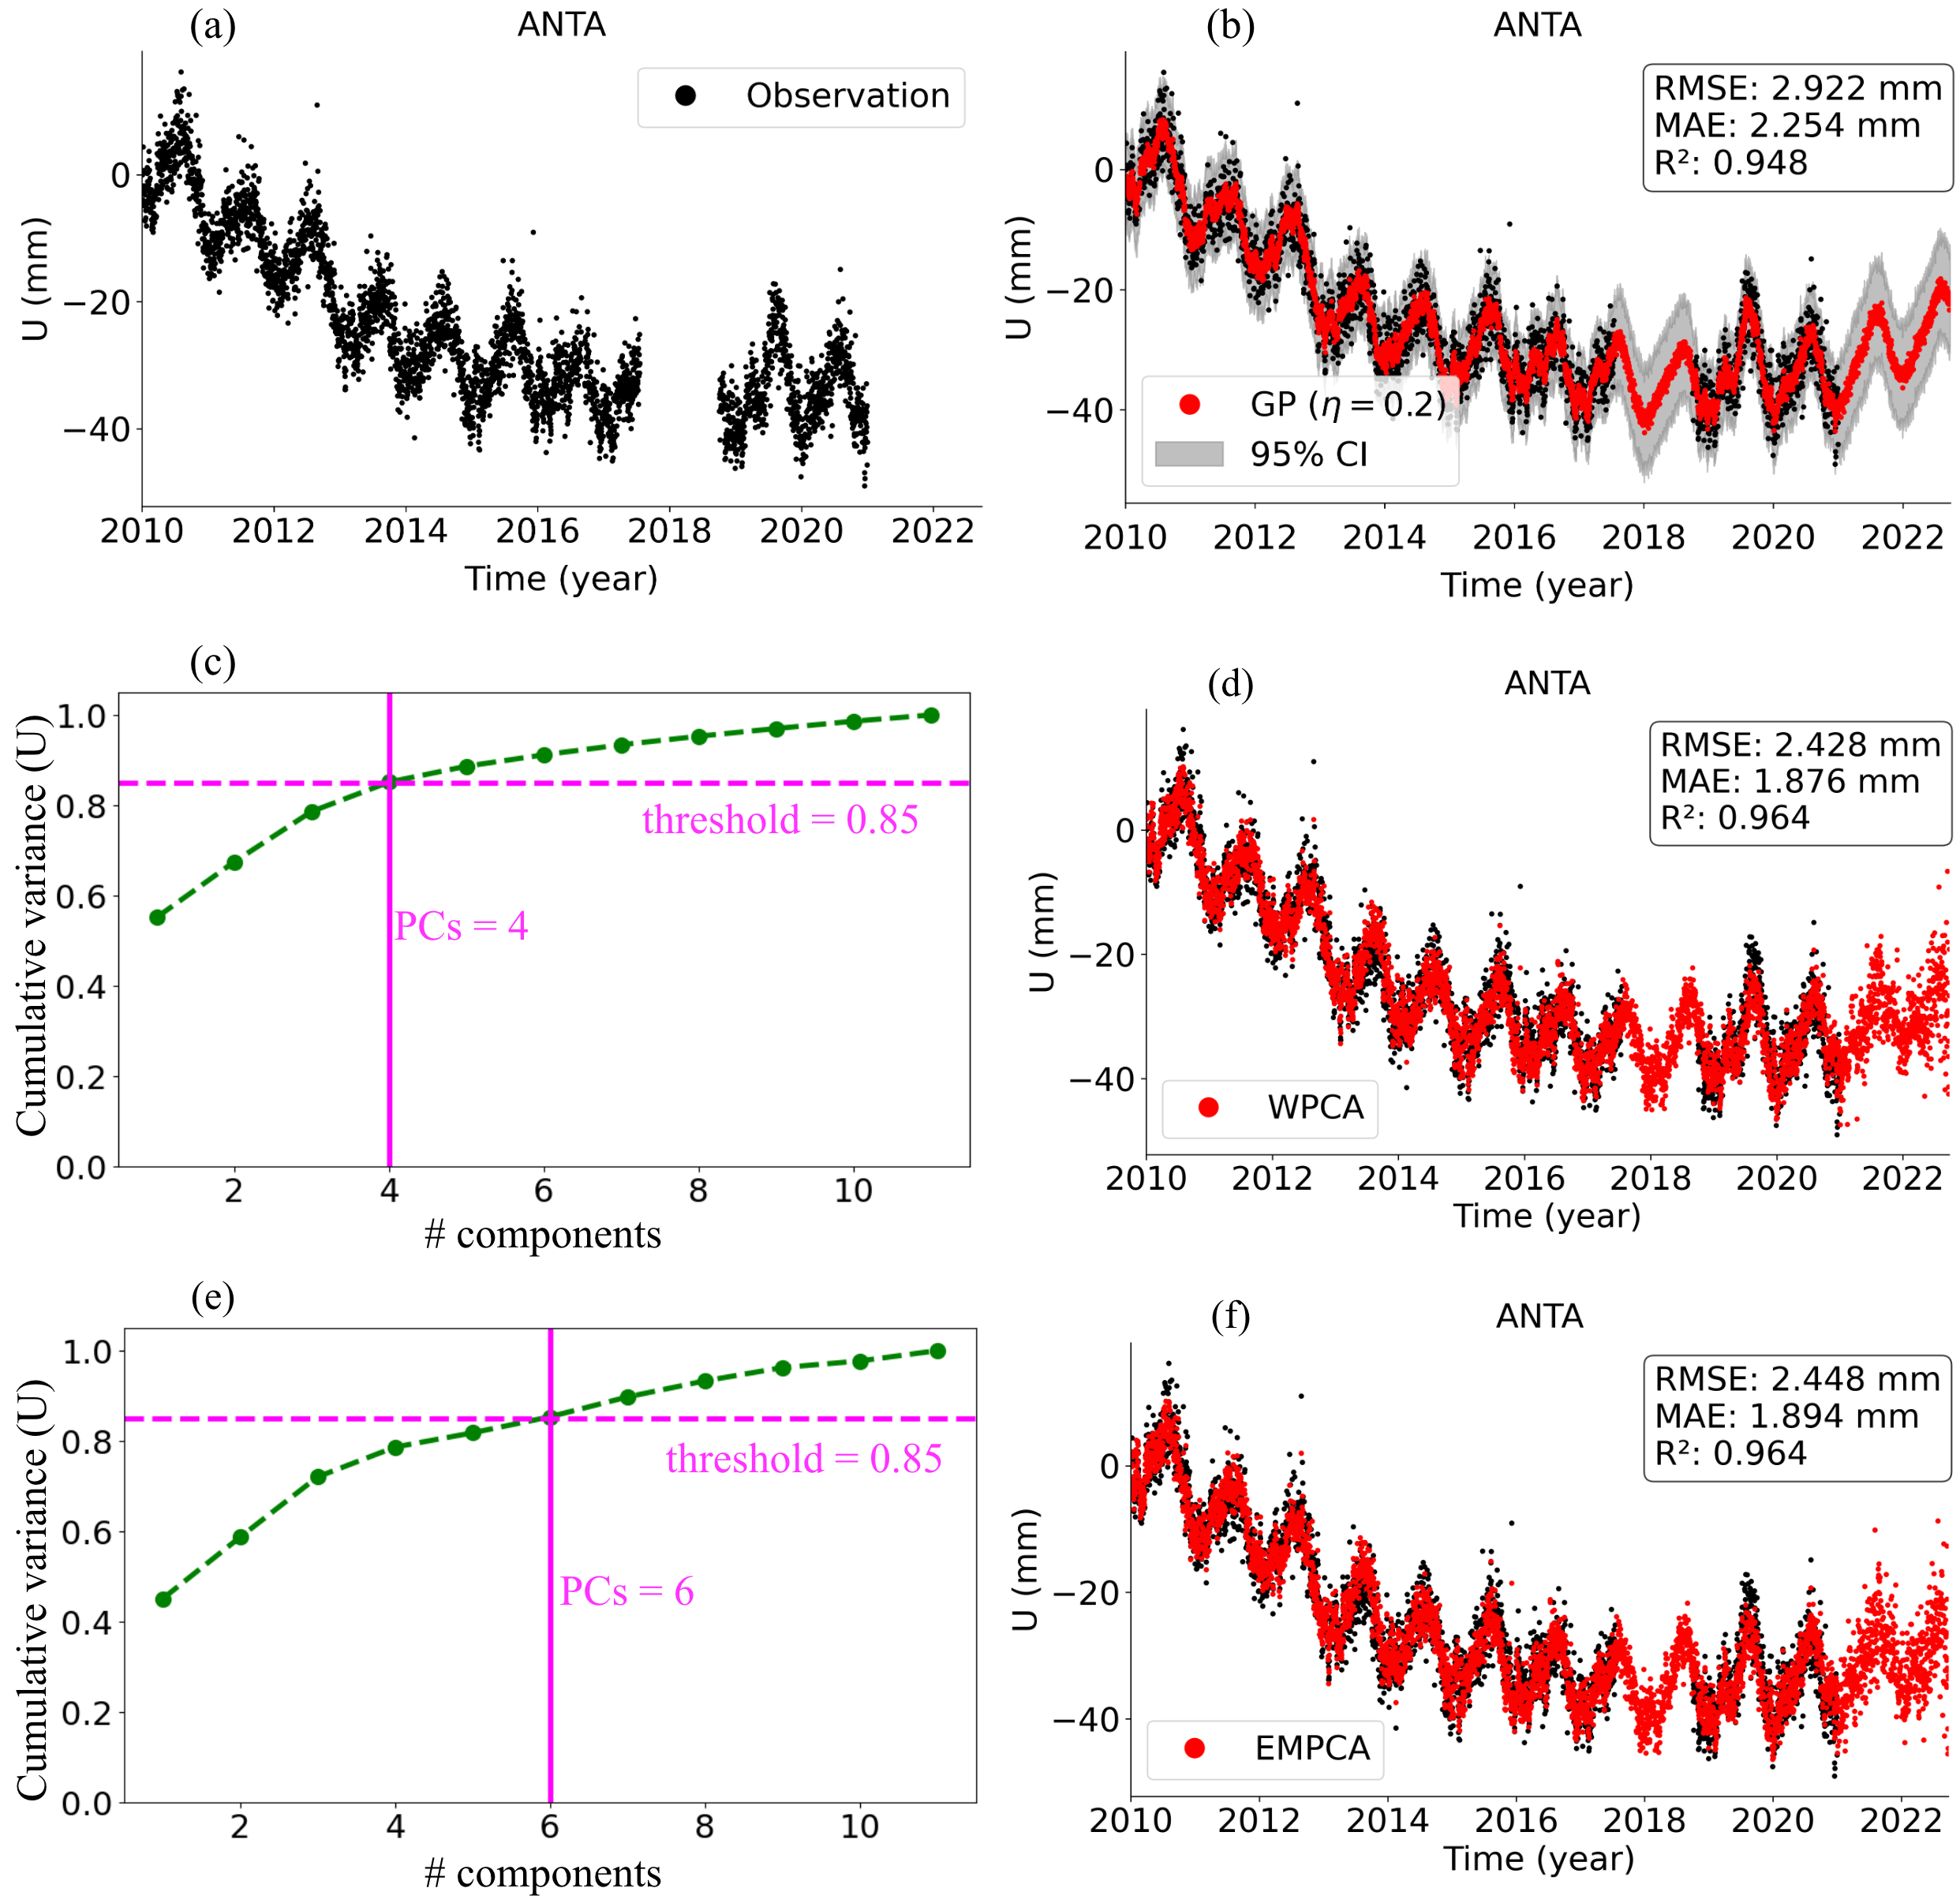


**Fig. E1.** Field data imputation for the GNSS vertical component at station ANTA. (a) Original series with gaps. (b) GP-filled series (95% confidence interval (CI) in grey). (c) WPCA variance plot. (d) WPCA output (4 PCs). (e) EMPCA variance plot. (f) EMPCA output (6 PCs).
